32 **Abstract**

33 Scleractinian corals are essential ecosystem engineers, forming the basis of coral reef ecosystems.  
34 However, these organisms are in decline globally, in part due to rising disease prevalence. Most  
35 corals are dependent on symbiotic interactions with single-celled algae from the family  
36 *Symbiodiniaceae* to meet their nutritional needs, however suppression of host immunity may be  
37 essential to this relationship. To explore immunological consequences of algal symbioses in  
38 scleractinian corals, we investigated constitutive immune activity in the facultatively symbiotic  
39 coral, *Astrangia poculata*. We compared immune metrics (melanin synthesis, antioxidant  
40 production, and antibacterial activity) between coral colonies of varying symbiont density.  
41 Symbiont density was positively correlated to both antioxidant activity and melanin concentration.  
42 Our results suggest that the relationship between algal symbiosis and host immunity may be more  
43 complex than originally hypothesized and highlight the need for nuanced approaches when  
44 considering these relationships.

45

46

## 47 Introduction

48 Scleractinian corals are key ecosystem engineers, which create the structural basis of diverse coral  
49 reef systems [1]. However, the health of coral reefs worldwide is deteriorating, largely due to  
50 anthropogenic climate change [2]. Changing environmental conditions such as increased ocean  
51 temperatures and ocean acidification have led to coral die-offs [3]; global coral reef cover has  
52 declined by 50% from 1957 to 2007 [4]. The two largest drivers of coral mortality have been  
53 disease outbreaks and bleaching events [5-7]. Previous studies suggest extensive inter- and  
54 intraspecific variation in response to disease [8] and propensity to bleaching [9]. However, while  
55 the factors contributing to variation in bleaching susceptibility have been well studied in many  
56 coral species [9, 10], the mechanisms driving variation in coral disease susceptibility largely  
57 remain unknown.

58 The coral immune response consists of pathogen recognition, signaling pathways, and effector  
59 responses [11]. Corals have a variety of pathogen recognition molecules, such as Toll-like  
60 receptors and NOD-like receptors, capable of identifying a diversity of pathogens [12]. Post-  
61 recognition, signaling pathways appropriate defense mechanisms and trigger effector responses  
62 [12]. Corals use effector responses such as melanin production, antioxidants, and/or antimicrobial  
63 peptides to eliminate pathogens [12]. Preliminary evidence suggests that natural variation in  
64 several immune components might contribute to variation in disease resistance [13-15].

65 Beyond its role in pathogenic defense, the coral immune system also plays roles in the maintenance  
66 of symbioses [16, 17]. The onset and maintenance of coral symbiosis with Symbiodiniaceae is  
67 theorized to circumvent or modulate host immune response [18]. Furthermore, modification of  
68 immunity may extend beyond establishment of the relationship. In the threatened Caribbean coral  
69 *Orbicella faveolata* higher Symbiodiniaceae density was linked to negative effects on host immune  
70 gene expression [19]. Similarly, in *Exaiptasia diaphana*, symbiotic state was found to modulate  
71 NF- $\kappa$ B, a transcription factor responsible for numerous immune effector responses [20]. Still many  
72 questions remain regarding links between symbiosis and immunity in corals. To better understand  
73 how Symbiodiniaceae density and immunity might be linked in scleractinian corals, we  
74 investigated variation in constitutive immunity among colonies of the facultatively symbiotic  
75 scleractinian coral, *Astrangia poculata*, with variable symbiont densities.

76

## 77 Materials & Methods

### 78 Sample collection

79 *Astrangia poculata* colonies were collected from Fort Wetherill in Jamestown, Rhode Island in  
80 April 2021 (41°28'40" N, 71°21'34" W) at a depth of 10-15 meters, via SCUBA. Colonies were  
81 visually assessed and sorted into either high or low symbiont density groups (termed “brown” or  
82 “white” colonies respectively); 10 colonies of each type were collected. Visual assessment of  
83 colony color is a reliable method for distinguishing corals with high symbiont density ( $>10^6$  cells  
84  $\text{cm}^{-2}$ ) from those with low symbiont density ( $10^4$ - $10^6$  cells  $\text{cm}^{-2}$  [21]). It should be noted that we  
85 use the terms “brown” and “white” as colonies grouped in the white category are rarely completely

86 aposymbiotic. Following collection, the colonies were returned to Roger Williams University  
87 where they were maintained for several weeks in closed systems containing locally sourced  
88 seawater and fed three times weekly with frozen copepod feed. Samples were then flash frozen in  
89 liquid nitrogen and shipped to Texas State University for analyses.

#### 90 Protein extraction

91 Tissue was removed from colonies with extraction buffer (TRIS with DTT, pH 7.8) using protocols  
92 outlined by Fuess [22]. First, tissue was removed and isolated from a fixed surface area (2.14 cm<sup>2</sup>)  
93 on the flattest portion of the coral for Symbiodiniaceae density calculation. Then, tissue from the  
94 remaining fragment was removed and isolated into a separate aliquot. Both aliquots of tissue  
95 extracts were homogenized using a Fisherbrand Homogenizer 150 prior to downstream processing.

96 The Symbiodiniaceae aliquot was processed using a series of consecutive centrifugation and wash  
97 steps. The homogenate was centrifuged at 2000 RPM for 3 minutes and the supernatant was  
98 removed. The resultant pellet was resuspended in 500µL, and the product was centrifuged again  
99 using the same procedure. This step was repeated, and the sample was preserved in 500µL of  
100 0.01% SDS in deionized water, stored at 4C.

101 The host aliquot was processed to obtain subsamples for protein activity assays and melanin  
102 concentration estimation. Following homogenization, 1 mL of the host aliquot was flash frozen,  
103 and stored at 20°C for melanin concentration estimation (see **Melanin** section). The remainder of  
104 the host aliquot was centrifuged for 5 minutes at 3500 RPM using an Eppendorf Centrifuge 5425  
105 R. The resulting supernatant (protein enriched cell-free extract) was flash frozen in liquid nitrogen  
106 and stored at -80°C for downstream assays.

#### 107 Symbiont density

108 Symbiodiniaceae density was estimated using a standard hemocytometer and Nikon Eclipse E600  
109 microscope. Symbiodiniaceae counts were repeated in triplicate and averaged to calculate  
110 symbiont density/tissue area.

#### 111 Biochemical Immune Assays

112 A Red660 assay (G Biosciences, St. Louis, Missouri) based on existing methods [23] was used to  
113 determine sample protein concentration and standardize assays. All immune assays were run in  
114 duplicates on 96 well plates using a Cytation 1 cell imaging multi-mode reader with Gen5 software  
115 (BioTek).

#### 116 Prophenoloxidase Cascade Assays (PPO, PO, and MEL)

117 Total phenoloxidase activity (PPO + PO) and melanin abundance was estimated using previously  
118 established methods [22] adapted to *A. poculata*. For total phenoloxidase activity, 20µL of coral  
119 extract were diluted into 20µL of 50 mM phosphate buffered saline (pH 7.0) in a 96 well plate  
120 (Greiner bio-one, Frickenhausen, Germany). Samples were incubated with 25µL of trypsin (0.1  
121 mg/mL) for 30 minutes at room temperature, allowing for cleavage of PPO into PO. Post-  
122 incubation, 30µL of dopamine was added to each well. Absorbance was read every minute for 20

123 minutes at 490nm. Change of absorbance at the steepest point of the curve was used to calculate  
124 total phenoloxidase activity, standardized by protein concentration [22, 24].

125 To estimate melanin concentration, subsampled tissue extracts for the melanin assay were dried  
126 on a speed vac (Eppendorf, Vacufuge plus) in a tarred 1.5mL microcentrifuge tube. Dried tissues  
127 were weighed and processed to assess melanin concentration. Two hundred microliters of glass  
128 beads (10mm) were added to each tube. Samples were then vortexed for 10 seconds and 400uL of  
129 10M NaOH was added to each tube. Tubes were vortexed for 20 seconds and incubated in the dark  
130 for 48 hours, with a second 20 second vortexing occurring after 24 hours. Post-incubation, the  
131 tubes were vortexed and then centrifuged at 1000 RPM for 10 minutes at room temperature. The  
132 resultant supernatant (40μL) was transferred to a ½ well UV plate (UV-STAR, Greiner bio-one,  
133 Frickenhausen, Germany). Absorbance was read at 410 and 490nm. We used a standard curve of  
134 melanin dissolved in 10M NaOH to calculate mg melanin from absorbance [22, 24]. Melanin  
135 concentration was standardized per mg of dried tissue weight.

### 136 Antioxidant Assays

137 The activity of two coral antioxidants was investigated: catalase (CAT) and peroxidase (POX),  
138 following established methods [22, 24], adapted to *A. poculata*. Catalase was measured by diluting  
139 5μL of sample with 45μL of 50mM PBS (pH 7.0) in a transparent UV 96-well plate (UV-STAR,  
140 Greiner bio-one, Frickenhausen, Germany). To initiate the reaction, 75μL of 25mM H<sub>2</sub>O<sub>2</sub> was  
141 added to each well. Absorbance was read at 240nm every 30 seconds for 15 minutes. Scavenged  
142 H<sub>2</sub>O<sub>2</sub> was calculated as the change in absorbance at the steepest portion of the curve. A standard  
143 curve was used to determine change in H<sub>2</sub>O<sub>2</sub> concentration (mM), and results were standardized  
144 by protein concentration [22, 24].

145 To measure peroxidase activity, 20μL of sample was diluted in 20μL of 10mM PBS (pH 6.0) in a  
146 standard 96-well plate (Costar, Corning, Kennebunk, ME). Fifty microliters of 25mM guaiacol in  
147 10mM of PBS (pH 6.0) was added to each well of the plate. To initiate the reaction, 20μL of 20mM  
148 H<sub>2</sub>O<sub>2</sub> was added to each well. Absorbance was read every minute for 15 minutes at a wavelength  
149 of 470nm. Peroxidase activity was calculated as the change in absorbance at the steepest portion  
150 of the curve, standardized by protein concentration [22, 25].

### 151 Antibacterial Assay

152 Antibacterial activity of *A. poculata* samples was assessed against *Vibrio coralliilyticus* (strain  
153 RE22Sm; provided by D. Nelson University of Rhode Island), a known coral pathogen [26].  
154 Bacterial culture was revived from frozen stock and grown overnight in Luria broth (LB). After  
155 24 hours, 1mL of bacterial culture was diluted in 100mL of mYP30 broth and grown for an  
156 additional 48 hours. Prior to assays, the culture was diluted to a final optical density at 600nm of  
157 0.2. To initiate the assay, 140μL of bacterial culture and 60μL of sample, diluted to a standard  
158 protein concentration, were combined into wells of a sterile 96-well plate (Costar, Corning,  
159 Kennebunk, ME). Sample absorbance was read every 10 minutes at 600nm for 6 hours at 27°C.  
160 Change in absorbance during the logarithmic growth phase of the curve was used to calculate  
161 growth rate [22, 23].

162 Statistical Analyses

163 Prior to statistical testing, outliers were identified and removed if necessary, using the ‘nooutlier’  
164 function in R. Normality was also assessed, and data was transformed as needed; Symbiodiniaceae  
165 density was square root transformed. We assessed the effects of symbiont density on each of our  
166 immunological metrics using two approaches. First, we tested for differences in assay activity  
167 between colonies grouped as white or brown using a t-test. Second, we used a Pearson correlation  
168 test to assess direct correlations between symbiont density and assay activity. T-tests and  
169 correlations were run independently for each assay.

170

171 **Results**

172 Statistical analysis revealed a significant association between symbiotic state and host immune  
173 phenotypes. Both melanin concentration (t-test,  $p=0.002$ ; Figure 1A) and catalase activity (T-test,  
174  $p=0.007$ ; Figure 1B) were significantly higher in brown colonies than white. Furthermore, melanin  
175 concentration (Pearson correlation,  $R=0.62$ ,  $p=0.006$ ; Figure 1C) and catalase activity (Pearson  
176 correlation,  $R=0.62$ ,  $p=0.007$ ; Figure 1D) were significantly positively correlated to symbiont  
177 density. No other assays were significantly associated with symbiont state or symbiont density  
178 (**Tables 1-2**).

179

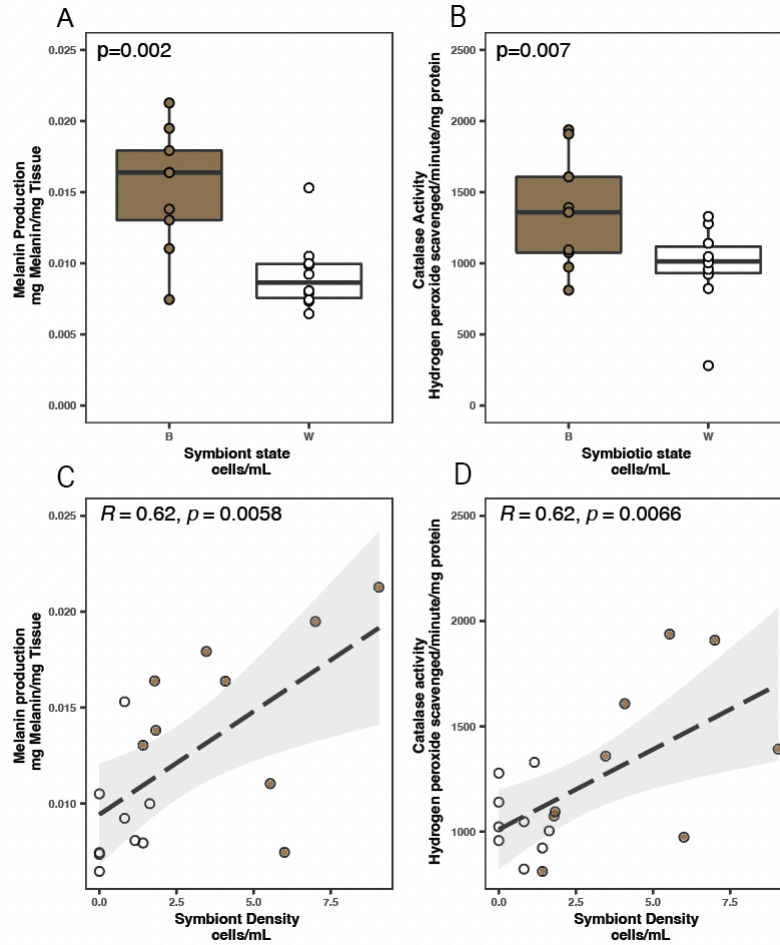

180

181 **Figure 1.** Both symbiotic state and symbiotic density affect melanin concentration and catalase  
182 activity. **A-B:** Box and whisker plots displaying differences in immune parameters between  
183 white and brown colonies for melanin (**A**) and catalase (**B**). **C-D:** symbiotic-immune assay  
184 correlation results for melanin concentration (**C**) and catalase activity (**D**).

185

186 **Table 1.** T-test results for each immunological assay.

| <b>Assay</b>     | <b>Statistic value</b> | <b>dF</b> | <b>p-value</b> |
|------------------|------------------------|-----------|----------------|
| Peroxidase       | -0.591                 | 14.4      | 0.564          |
| Prophenoloxidase | -0.865                 | 17        | 0.399          |
| Catalase         | 2.02                   | 10.6      | 0.070*         |
| Antibacterial    | 1.55                   | 17        | 0.139          |
| Melanin          | 4.40                   | 9.66      | 0.002*         |

187

188

189 **Table 2.** Pearson-correlation results between assay activity and square-root transformed symbiont  
190 density.

| <b>Assay</b>     | <b>dF</b> | <b>p-value</b> | <b>corr. value</b> |
|------------------|-----------|----------------|--------------------|
| Peroxidase       | 17        | 0.6113         | 0.1245913          |
| Prophenoloxidase | 17        | 0.7902         | 0.06541795         |
| Catalase         | 17        | 0.01889*       | 0.5466783          |
| Antibacterial    | 17        | 0.783          | 0.06769716         |
| Melanin          | 17        | 0.00788*       | 0.5896661          |

191

192



## 193 Discussion

194 Here we used a facultatively symbiotic coral, *Astrangia poculata*, to investigate trade-offs between  
195 constitutive immunity and Symbiodineaceae density in corals. Past studies have suggested trade-  
196 offs between the maintenance of symbiotic relationship and immunity in obligately symbiotic  
197 corals [19]. In contrast, our results show no trade-offs between Symbiodineaceae abundance and  
198 constitutive immunity. Instead, we find a positive association between constitutive immunity and  
199 Symbiodineaceae density in *A. poculata*. These findings suggest that the relationship between algal  
200 symbiosis and immunity may be more complex than conventionally thought and highlight the need  
201 for further study of symbiosis-immune interplay in diverse systems.

202 Here we document positive correlations between symbiont density and two metrics of constitutive  
203 immunity: catalase activity and melanin concentration. Importantly, while both systems function  
204 in immunity, they also serve secondary roles in maintenance of coral-algal symbiosis [27]. While  
205 antioxidant activity is important in combating ROS bursts associated with pathogen defense, it is  
206 also important in general stress response, including response to thermal stressors [28]. Symbiont  
207 release of ROS is believed to be a cause of thermally induced bleaching, or breakdown of algal  
208 symbiosis [29]. Consistent with this theory, increased antioxidant production is associated with  
209 increased resistance to thermal bleaching [30]. Similarly, in addition to its roles in encapsulation  
210 of pathogens [12], melanin may play secondary roles in stress response, including protection of  
211 algal symbionts from UV damage (i.e., symbiont shading; [31]). Consequently, observed patterns  
212 of higher activity of these two pathways may be indicative of algal symbiont management and  
213 proactive stress mitigation mechanisms rather than direct consequences of symbiosis on immunity.

214 A second hypothesis could explain the observed associations between Symbiodineaceae density  
215 and immunity more generally: resource allocation theory. Resource allocation theory posits that  
216 organisms allocate a fixed energetic budget to competing needs (ex: growth, reproduction, and  
217 immunity; [32]). When energy budgets are fixed, increases in any one category come at the cost  
218 of another (i.e. tradeoffs; [32]). Consequently, energetic budgets can have significant impacts on  
219 resources allocated to immunity. For example, reductions in energy budgets caused by starvation  
220 resulted in decreased expression of immune genes and resistance to pathogens in the cnidarian  
221 *Nematostella vectensis* [33]. Indeed facultative symbiosis may be a natural source of variation in  
222 energetic budget; colonies of corals with variable densities of Symbiodineaceae may vary in their  
223 base energetic budget due to increased photosynthetically derived carbon. Past studies have linked  
224 increased photosynthetic energy acquisition to increased Symbiodineaceae density [34, 35].  
225 Consequently, increased densities of Symbiodineaceae may increase a colonies total energetic  
226 budget, allowing for greater resource allocation to immunity and explaining positive correlations  
227 between certain immune phenotypes (catalase and melanin) and Symbiodineaceae density.

228 In summary, our results highlight a positive association between Symbiodineaceae density and  
229 immune parameters, which contrasts past studies of obligately symbiotic corals. This association  
230 is most likely either related to the dual function of these parameters or a consequence of increased  
231 energetic budgets associated with symbiosis. Importantly, our approach only measured a subset of  
232 potential effector responses. Future studies incorporating more responses or measures of receptor  
233 and signaling activity would improve interpretation of these trends. Additionally, our results are

234 limited to the context of constitutive immunity; further studies considering pathogen response  
235 would be informative. Nevertheless, our data provides an important first step in highlighting the  
236 nuanced association between immunity and algal symbiosis in scleractinian corals.

237

### 238 **Acknowledgements**

239 The authors extend appreciation to the annual Temperate Coral Research Conferences hosted by  
240 Roger Williams University, Boston University, and Southern Connecticut State University for  
241 fostering creative conversations and collaborations leading to this work. *Astrangia poculata*  
242 colonies were collected by Michael Lombardi, Ocean Opportunity, LLC.

### 243 **Funding**

244 This work was supported by Texas State University (startup funds to LEF) and the NIH NIGMS  
245 Institutional Development Award (IDeA) Network for Biomedical Research Excellence (grant  
246 P20GM103430 to KS).

### 247 **Author Contributions**

248 IC, KS, & LEF designed the experiment. KS & AS planned and executed sample collection and  
249 shipping. IC, HW, & LEF processed samples. IC & LEF conducted statistical analyses. All authors  
250 contributed to manuscript writing and revision.

251

252

253

254

255

256

257

258

259

260

261

262

263

264

## 265 References

- 266 [1] Burke, L., Reytar, K., Spalding, M. & Perry, A. 2011 *Reefs at Risk Revisited* 114 p.
- 267 [2] Meesters, E.H., Pauchli, W. & Bak, R.P.M. 1997 Predicting regeneration of physical damage
- 268 on a reef-building coral by regeneration capacity and lesion shape. *Marine Ecology Progress*
- 269 *Series* **146**, 91-99. (doi:DOI 10.3354/meps146091).
- 270 [3] Hughes, T.P., Baird, A.H., Bellwood, D.R., Card, M., Connolly, S.R., Folke, C., Grosberg,
- 271 R., Hoegh-Guldberg, O., Jackson, J.B., Kleypas, J., et al. 2003 Climate change, human impacts,
- 272 and the resilience of coral reefs. *Science* **301**, 929-933. (doi:10.1126/science.1085046).
- 273 [4] Eddy, T.D., Lam, V.W.Y., Reygondeau, G., Cisneros-Montemayor, A.M., Greer, K.,
- 274 Palomares, M.L.D., Bruno, J.F., Ota, Y. & Cheung, W.W.L. 2021 Global decline in capacity of
- 275 coral reefs to provide ecosystem services. *One Earth* **4**, 1278-1285.
- 276 (doi:10.1016/j.oneear.2021.08.016).
- 277 [5] Miller, J., Muller, E., Rogers, C., Waara, R., Atkinson, A., Whelan, K.R.T., Patterson, M. &
- 278 Witcher, B. 2009 Coral disease following massive bleaching in 2005 causes 60% decline in coral
- 279 cover on reefs in the US Virgin Islands. *Coral Reefs* **28**, 925-937. (doi:10.1007/s00338-009-
- 280 0531-7).
- 281 [6] Croquer, A. & Weil, E. 2009 Changes in Caribbean coral disease prevalence after the 2005
- 282 bleaching event. *Dis Aquat Organ* **87**, 33-43. (doi:10.3354/dao02164).
- 283 [7] Evans, R.D., Wilson, S.K., Fisher, R., Ryan, N.M., Babcock, R., Blakeway, D., Bond, T.,
- 284 Dorji, P., Dufois, F., Fearn, P., et al. 2020 Early recovery dynamics of turbid coral reefs after
- 285 recurring bleaching events. *J Environ Manage* **268**, 110666.
- 286 (doi:10.1016/j.jenvman.2020.110666).
- 287 [8] Weil, E. 2004 Coral reef diseases in the wider Caribbean. *Coral Health and Disease*, 35-68.
- 288 (doi:10.1007/978-3-662-06414-6\_2).
- 289 [9] Marshall, P.A. & Baird, A.H. 2000 Bleaching of corals on the Great Barrier Reef: differential
- 290 susceptibilities among taxa. *Coral Reefs* **19**, 155-163. (doi:10.1007/s003380000086).
- 291 [10] Krueger, T., Hawkins, T.D., Becker, S., Pontasch, S., Dove, S., Hoegh-Guldberg, O.,
- 292 Leggat, W., Fisher, P.L. & Davy, S.K. 2015 Differential coral bleaching-Contrasting the activity
- 293 and response of enzymatic antioxidants in symbiotic partners under thermal stress. *Comp*
- 294 *Biochem Physiol A Mol Integr Physiol* **190**, 15-25. (doi:10.1016/j.cbpa.2015.08.012).
- 295 [11] Mydlarz, L.D., Fuess, L., Mann, W., Pinzón, J.H. & Gochfeld, D.J. 2016 Cnidarian
- 296 Immunity: From Genomes to Phenomes. In *The Cnidaria, Past, Present and Future: The world*
- 297 *of Medusa and her sisters* (eds. S. Goffredo & Z. Dubinsky), pp. 441-466. Cham, Springer
- 298 International Publishing.
- 299 [12] Palmer, C.V. & Traylor-Knowles, N. 2012 Towards an integrated network of coral immune
- 300 mechanisms. *Proc Biol Sci* **279**, 4106-4114. (doi:10.1098/rspb.2012.1477).
- 301 [13] Palmer, C.V., Bythell, J.C. & Willis, B.L. 2010 Levels of immunity parameters underpin
- 302 bleaching and disease susceptibility of reef corals. *FASEB J* **24**, 1935-1946. (doi:10.1096/fj.09-
- 303 152447).
- 304 [14] Fuess, L.E., Pinzon, C.J., Weil, E., Grinshpon, R.D. & Mydlarz, L.D. 2017 Life or death:
- 305 disease-tolerant coral species activate autophagy following immune challenge. *Proc Biol Sci*
- 306 **284**. (doi:10.1098/rspb.2017.0771).
- 307 [15] Levy, S., Elek, A., Grau-Bové, X., Menéndez-Bravo, S., Iglesias, M., Tanay, A., Mass, T. &
- 308 Sebe-Pedros, A. 2021 A stony coral cell atlas illuminates the molecular and cellular basis of
- 309 coral symbiosis, calcification, and immunity. *Cell* **184**, 2973-2987 e2918.
- 310 (doi:10.1016/j.cell.2021.04.005).

- 311 [16] Fuess, L.E., Butler, C.C., Brandt, M.E. & Mydlarz, L.D. 2020 Investigating the roles of  
312 transforming growth factor-beta in immune response of *Orbicella faveolata*, a scleractinian coral.  
313 *Dev Comp Immunol* **107**, 103639. (doi:10.1016/j.dci.2020.103639).
- 314 [17] Kvennefors, E.C., Leggat, W., Kerr, C.C., Ainsworth, T.D., Hoegh-Guldberg, O. & Barnes,  
315 A.C. 2010 Analysis of evolutionarily conserved innate immune components in coral links  
316 immunity and symbiosis. *Dev Comp Immunol* **34**, 1219-1229. (doi:10.1016/j.dci.2010.06.016).
- 317 [18] Meyer, E. & Weis, V.M. 2012 Study of cnidarian-algal symbiosis in the "omics" age. *Biol*  
318 *Bull* **223**, 44-65. (doi:10.1086/BBLv223n1p44).
- 319 [19] Fuess, L.E., Palacio-Castro, A.M., Butler, C.C., Baker, A.C. & Mydlarz, L.D. 2020  
320 Increased Algal Symbiont Density Reduces Host Immunity in a Threatened Caribbean Coral  
321 Species, *Orbicella faveolata*. *Frontiers in Ecology and Evolution* **8**.  
322 (doi:10.3389/fevo.2020.572942).
- 323 [20] Mansfield, K.M., Carter, N.M., Nguyen, L., Cleves, P.A., Alshanbayeva, A., Williams,  
324 L.M., Crowder, C., Penvose, A.R., Finnerty, J.R., Weis, V.M., et al. 2017 Transcription factor  
325 NF-kappaB is modulated by symbiotic status in a sea anemone model of cnidarian bleaching. *Sci*  
326 *Rep* **7**, 16025. (doi:10.1038/s41598-017-16168-w).
- 327 [21] Sharp, K.H., Pratte, Z.A., Kerwin, A.H., Rotjan, R.D. & Stewart, F.J. 2017 Season, but not  
328 symbiont state, drives microbiome structure in the temperate coral *Astrangia poculata*.  
329 *Microbiome* **5**, 120. (doi:10.1186/s40168-017-0329-8).
- 330 [22] Fuess, L.E., Pinzomicronn, C.J., Weil, E. & Mydlarz, L.D. 2016 Associations between  
331 transcriptional changes and protein phenotypes provide insights into immune regulation in  
332 corals. *Dev Comp Immunol* **62**, 17-28. (doi:10.1016/j.dci.2016.04.017).
- 333 [23] Pinzon, C.J., Beach-Letendre, J., Weil, E. & Mydlarz, L.D. 2014 Relationship between  
334 phylogeny and immunity suggests older Caribbean coral lineages are more resistant to disease.  
335 *PLoS One* **9**, e104787. (doi:10.1371/journal.pone.0104787).
- 336 [24] Mydlarz, L.D. & Palmer, C.V. 2011 The presence of multiple phenoloxidases in Caribbean  
337 reef-building corals. *Comp Biochem Physiol A Mol Integr Physiol* **159**, 372-378.  
338 (doi:10.1016/j.cbpa.2011.03.029).
- 339 [25] Mydlarz, L.D. & Harvell, C.D. 2007 Peroxidase activity and inducibility in the sea fan coral  
340 exposed to a fungal pathogen. *Comp Biochem Physiol A Mol Integr Physiol* **146**, 54-62.  
341 (doi:10.1016/j.cbpa.2006.09.005).
- 342 [26] Vidal-Dupiol, J., Ladriere, O., Meistertzheim, A.L., Foure, L., Adjeroud, M. & Mitta, G.  
343 2011 Physiological responses of the scleractinian coral *Pocillopora damicornis* to bacterial stress  
344 from *Vibrio coralliilyticus*. *J Exp Biol* **214**, 1533-1545. (doi:10.1242/jeb.053165).
- 345 [27] Merle, P.L., Sabourault, C., Richier, S., Allemand, D. & Furla, P. 2007 Catalase  
346 characterization and implication in bleaching of a symbiotic sea anemone. *Free Radic Biol Med*  
347 **42**, 236-246. (doi:10.1016/j.freeradbiomed.2006.10.038).
- 348 [28] Wall, C.B., Ricci, C.A., Foulds, G.E., Mydlarz, L.D., Gates, R.D. & Putnam, H.M. 2018  
349 The effects of environmental history and thermal stress on coral physiology and immunity.  
350 *Marine Biology* **165**, 56. (doi:10.1007/s00227-018-3317-z).
- 351 [29] Szabó, M., Larkum, A.W.D. & Vass, I. 2020 A Review: The Role of Reactive Oxygen  
352 Species in Mass Coral Bleaching. In *Photosynthesis in Algae: Biochemical and Physiological*  
353 *Mechanisms* (eds. A.W.D. Larkum, A.R. Grossman & J.A. Raven), pp. 459-488. Cham, Springer  
354 International Publishing.
- 355 [30] Nielsen, D.A., Petrou, K. & Gates, R.D. 2018 Coral bleaching from a single cell  
356 perspective. *ISME J* **12**, 1558-1567. (doi:10.1038/s41396-018-0080-6).

- 357 [31] Palmer, C.V., Bythell, J.C. & Willis, B.L. 2011 A comparative study of phenoloxidase  
358 activity in diseased and bleached colonies of the coral *Acropora millepora*. *Dev Comp Immunol*  
359 **35**, 1098-1101. (doi:10.1016/j.dci.2011.04.001).
- 360 [32] Sadd, B.M. & Schmid-Hempel, P. 2009 Principles of ecological immunology. *Evol Appl* **2**,  
361 113-121. (doi:10.1111/j.1752-4571.2008.00057.x).
- 362 [33] Aguirre Carrión, P.J., Desai, N., Brennan, J.J., Fifer, J.E., Davies, S.W. & Gilmore, T.D.  
363 2022. (doi:10.1101/2022.06.09.495518).
- 364 [34] Hughes, A.D., Grottoli, A.G., Pease, T.K. & Matsui, Y. 2010 Acquisition and assimilation  
365 of carbon in non-bleached and bleached corals. *Marine Ecology Progress Series* **420**, 91-101.  
366 (doi:10.3354/meps08866).
- 367 [35] Pupier, C.A., Fine, M., Bednarz, V.N., Rottier, C., Grover, R. & Ferrier-Pages, C. 2019  
368 Productivity and carbon fluxes depend on species and symbiont density in soft coral symbioses.  
369 *Sci Rep* **9**, 17819. (doi:10.1038/s41598-019-54209-8).

370
